# Supplementary material
Source: Springer Nature journal article supplement (https://www.springermedizin.de/resource/supplementary/12937_2008_183_MOESM1_ESM.pdf/25654572)

Nasal  
Symptom  
Score

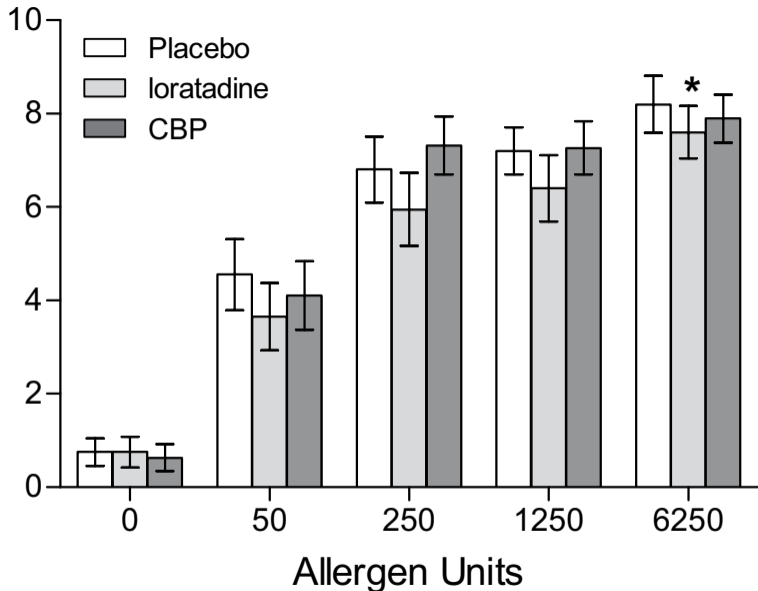

\* P = 0.04 vs. Placebo

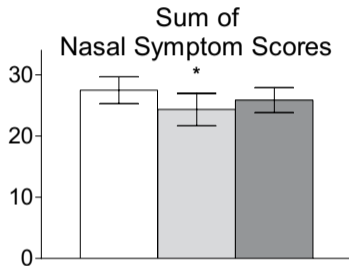

Supplement: MOESM1 [file 25654572]
